# Supplementary material for: Comparison of Different Drying Methods on the Volatile Components of Ginger (Zingiber officinale Roscoe) by HS-GC-MS Coupled with Fast GC E-Nose
Source: MDPI journal article supplement (doi:10.3390/foods11111611), 2022-05-30
Supplement: s1 [file s1]

# Comparison of different drying methods on the volatile components of ginger (*Zingiber officinale* Roscoe) by HS-GC-MS coupled with fast GC e-nose

Dai-Xin Yu <sup>1</sup>, Sheng Guo <sup>1,\*</sup>, Jie-Mei Wang <sup>1</sup>, Hui Yan <sup>1</sup>, Zhen-Yu Zhang <sup>1</sup>, Jian Yang <sup>2</sup> and Jin-Ao Duan <sup>1,\*</sup>

<sup>1</sup> National and Local Collaborative Engineering Center of Chinese Medicinal Resources Industrialization and Formulae Innovative Medicine, Jiangsu Collaborative Innovation Center of Chinese Medicinal Resources Industrialization, Nanjing University of Chinese Medicine, Nanjing 210023, China; yudaixin0616@163.com (D.-X.Y.); wjm991106@163.com (J.-M.W.); yanhui@njucm.edu.cn (H.Y.); 15251766992@163.com (Z.-Y.Z.)

<sup>2</sup> State Key Laboratory of Dao-di Herbs Breeding Base, National Resource Center for Chinese Materia Medica, China Academy of Chinese Medical Sciences, Beijing 100700, China; yangchem2012@163.com (J.Y.)

\* Correspondence: guosheng@njucm.edu.cn (S.G.); Tel.: +86-25-8581-1916 (S.G.); dja@njucm.edu.cn (J.-A.D.); Tel.: +86-25-8581-1291 (J.-A.D.)

**Table S1**

Contents of volatile chemical components by different drying methods in gingers by HS-GC-MS

| Compounds       | Contents (relative to n-decane, µg/g, mean ± SD) |                     |                     |                    |                    |                    |                   |                    |                    |
|-----------------|--------------------------------------------------|---------------------|---------------------|--------------------|--------------------|--------------------|-------------------|--------------------|--------------------|
|                 | HAD-50                                           | HAD-60              | HAD-70              | VD-50              | VD-60              | VD-70              | VFD               | SD                 | FG                 |
| <b>Terpenes</b> |                                                  |                     |                     |                    |                    |                    |                   |                    |                    |
| Tricyclene      | 1.78±                                            | 1.19±               | 1.53±               | 0.75±              | 1.66±              | 1.02±              | nd                | 0.39±              | 5.66±              |
|                 | 0.4 <sup>b</sup>                                 | 0.23 <sup>cd</sup>  | 0.15 <sup>bc</sup>  | 0.12 <sup>de</sup> | 0.29 <sup>b</sup>  | 0.15 <sup>d</sup>  |                   | 0.03 <sup>e</sup>  | 0.68 <sup>a</sup>  |
| α-Thujene       | 0.22±                                            | 0.13±               | 0.16±               | nd                 | nd                 | nd                 | nd                | nd                 | 0.65±              |
|                 | 0.14 <sup>b</sup>                                | 0.03 <sup>b</sup>   | 0.04 <sup>b</sup>   |                    |                    |                    |                   |                    | 0.11 <sup>a</sup>  |
| α-Pinene        | 43.32±                                           | 28.08±              | 37.54±              | 19.78±             | 39.81±             | 19.49±             | 2.42±             | 10.06±             | 127.73±            |
|                 | 9.56 <sup>b</sup>                                | 5.44 <sup>cd</sup>  | 4.14 <sup>bc</sup>  | 3.25 <sup>de</sup> | 5.81 <sup>b</sup>  | 10.4 <sup>de</sup> | 0.58 <sup>f</sup> | 1.15 <sup>ef</sup> | 11.63 <sup>a</sup> |
| Camphene        | 120.24±                                          | 83.42±              | 110.23±             | 50.38±             | 118.35±            | 70.69±             | 7.67±             | 33.54±             | 334.39±            |
|                 | 25.96 <sup>b</sup>                               | 17.26 <sup>cd</sup> | 10.56 <sup>bc</sup> | 9.33 <sup>de</sup> | 18.6 <sup>bc</sup> | 13.33 <sup>d</sup> | 2.16 <sup>g</sup> | 2.91 <sup>ef</sup> | 60.28 <sup>a</sup> |
| Sabinene        | 3.57±                                            | 2.27±               | 2.83±               | 1.59±              | 3.03±              | 1.78±              | nd                | 0.73±              | 5.71±              |
|                 | 0.96 <sup>b</sup>                                | 0.46 <sup>cd</sup>  | 0.26 <sup>bc</sup>  | 0.36 <sup>de</sup> | 0.45 <sup>bc</sup> | 0.45 <sup>d</sup>  |                   | 0.17 <sup>ef</sup> | 1.18 <sup>a</sup>  |
| β-Pinene        | 4.5±                                             | 3.43±               | 4.47±               | 2.08±              | 3.92±              | 2.33±              | 0.19±             | 1.38±              | 10.11±             |
|                 | 1.0 <sup>b</sup>                                 | 0.67 <sup>b</sup>   | 0.57 <sup>b</sup>   | 0.54 <sup>c</sup>  | 0.88 <sup>b</sup>  | 0.47 <sup>c</sup>  | 0.08 <sup>d</sup> | 0.17 <sup>c</sup>  | 1.31 <sup>a</sup>  |
| β-Myrcene       | 21.77±                                           | 15.87±              | 20.21±              | 9.81±              | 20.73±             | 11.81±             | 1.09±             | 6.67±              | 41.47±             |
|                 | 6.2 <sup>b</sup>                                 | 2.96 <sup>cd</sup>  | 1.59 <sup>bc</sup>  | 1.92 <sup>ef</sup> | 3.5 <sup>b</sup>   | 2.2 <sup>de</sup>  | 0.36 <sup>g</sup> | 0.7 <sup>f</sup>   | 4.67 <sup>a</sup>  |
| α-Phellandrene  | 23.53±                                           | 15.99±              | 18.88±              | 10.92±             | 21.02±             | 13.48±             | 1.32±             | 5.15±              | 27.71±             |
|                 | 6.67 <sup>ab</sup>                               | 2.51 <sup>de</sup>  | 1.7 <sup>cd</sup>   | 1.92 <sup>f</sup>  | 3.58 <sup>bc</sup> | 1.7 <sup>ef</sup>  | 0.36 <sup>g</sup> | 0.35 <sup>g</sup>  | 4.03 <sup>a</sup>  |
| 3-Carene        | 0.69±                                            | 0.54±               | 0.67±               | 0.35±              | 0.7±               | 0.42±              | nd                | 0.21±              | 1.24±              |
|                 | 0.25 <sup>b</sup>                                | 0.14 <sup>bc</sup>  | 0.24 <sup>b</sup>   | 0.14 <sup>cd</sup> | 0.14 <sup>b</sup>  | 0.12 <sup>cd</sup> |                   | 0.05 <sup>de</sup> | 0.15 <sup>a</sup>  |
| α-Terpinene     | 1.54±                                            | 1.03±               | 1.27±               | 0.56±              | 1.13±              | 0.69±              | nd                | 0.22±              | 1.59±              |
|                 | 0.52 <sup>a</sup>                                | 0.22 <sup>bc</sup>  | 0.2 <sup>ab</sup>   | 0.16 <sup>de</sup> | 0.16 <sup>b</sup>  | 0.19 <sup>dc</sup> |                   | 0.06 <sup>ef</sup> | 0.32 <sup>a</sup>  |
| p-Cymene        | 1.76±                                            | 1.51±               | 1.89±               | 0.99±              | 2±                 | 1.21±              | 0.18±             | 0.91±              | 4.86±              |

|                        |                      |                     |                     |                     |                     |                     |                   |                    |                    |
|------------------------|----------------------|---------------------|---------------------|---------------------|---------------------|---------------------|-------------------|--------------------|--------------------|
|                        | 0.55 <sup>b</sup>    | 0.33 <sup>bc</sup>  | 0.13 <sup>b</sup>   | 0.19 <sup>d</sup>   | 0.31 <sup>b</sup>   | 0.49 <sup>cd</sup>  | 0.05 <sup>e</sup> | 0.11 <sup>d</sup>  | 0.48 <sup>a</sup>  |
| $\beta$ -Phellandrene  | 450.82 $\pm$         | 311.75 $\pm$        | 381.45 $\pm$        | 225.55 $\pm$        | 429.87 $\pm$        | 299.64 $\pm$        | 31.12 $\pm$       | 110.54 $\pm$       | 525.35 $\pm$       |
|                        | 150.38 <sup>bc</sup> | 54.86 <sup>cd</sup> | 32.1 <sup>bc</sup>  | 33.47 <sup>d</sup>  | 75.29 <sup>bc</sup> | 59.55 <sup>cd</sup> | 9.59 <sup>e</sup> | 9.53 <sup>e</sup>  | 73.16 <sup>a</sup> |
| (Z)-Ocimene            | 0.67 $\pm$           | 0.75 $\pm$          | 0.57 $\pm$          | 0.59 $\pm$          | 1.24 $\pm$          | 0.49 $\pm$          |                   | 0.34 $\pm$         | 0.77 $\pm$         |
|                        | 0.45 <sup>b</sup>    | 0.43 <sup>b</sup>   | 0.2 <sup>b</sup>    | 0.27 <sup>b</sup>   | 0.52 <sup>a</sup>   | 0.16 <sup>b</sup>   | nd                | 0.12 <sup>bc</sup> | 0.31 <sup>b</sup>  |
| $\gamma$ -Terpinene    | 1.12 $\pm$           | 0.93 $\pm$          | 0.99 $\pm$          | 0.58 $\pm$          | 1.04 $\pm$          | 0.6 $\pm$           |                   | 0.29 $\pm$         | 1.54 $\pm$         |
|                        | 0.23 <sup>b</sup>    | 0.21 <sup>b</sup>   | 0.1 <sup>b</sup>    | 0.14 <sup>c</sup>   | 0.25 <sup>b</sup>   | 0.22 <sup>c</sup>   | nd                | 0.09 <sup>d</sup>  | 0.18 <sup>a</sup>  |
| Terpinolene            | 5.99 $\pm$           | 5.22 $\pm$          | 5.93 $\pm$          | 2.84 $\pm$          | 5.42 $\pm$          | 3.6 $\pm$           | 0.43 $\pm$        | 2.14 $\pm$         | 8.25 $\pm$         |
|                        | 1.86 <sup>b</sup>    | 1.44 <sup>b</sup>   | 0.37 <sup>b</sup>   | 0.74 <sup>cd</sup>  | 0.98 <sup>b</sup>   | 0.73 <sup>c</sup>   | 0.27 <sup>e</sup> | 0.3 <sup>d</sup>   | 1.01 <sup>a</sup>  |
| (+)-Sylvestrene        | 0.6 $\pm$            | 0.82 $\pm$          | 0.77 $\pm$          | 0.65 $\pm$          | 0.71 $\pm$          | 0.64 $\pm$          | 0.32 $\pm$        | 0.48 $\pm$         | 0.86 $\pm$         |
|                        | 0.13 <sup>cd</sup>   | 0.09 <sup>bc</sup>  | 0.1 <sup>bc</sup>   | 0.13 <sup>cd</sup>  | 0.27 <sup>bc</sup>  | 0.15 <sup>cd</sup>  | 0.14 <sup>e</sup> | 0.11 <sup>e</sup>  | 0.08 <sup>a</sup>  |
| (-)-Camphor            | nd                   | nd                  | nd                  | nd                  | nd                  | nd                  | nd                | nd                 | 1.29 $\pm$         |
|                        |                      |                     |                     |                     |                     |                     |                   |                    | 0.25               |
| Camphor                | 1.07 $\pm$           | 1.11 $\pm$          | 0.93 $\pm$          | 0.81 $\pm$          | 1.12 $\pm$          | 0.57 $\pm$          | 0.2 $\pm$         | 0.56 $\pm$         |                    |
|                        | 0.3 <sup>ab</sup>    | 0.23 <sup>ab</sup>  | 0.3 <sup>ab</sup>   | 0.12 <sup>bc</sup>  | 0.26 <sup>a</sup>   | 0.21 <sup>c</sup>   | 0.05 <sup>d</sup> | 0.12 <sup>c</sup>  | nd                 |
| (-)-Borneol            | 9.88 $\pm$           | 11.38 $\pm$         | 10.94 $\pm$         | 8.07 $\pm$          | 9.99 $\pm$          | 7.76 $\pm$          | 5.18 $\pm$        | 6.33 $\pm$         | 8.95 $\pm$         |
|                        | 3.35 <sup>ab</sup>   | 1.62 <sup>a</sup>   | 1.74 <sup>a</sup>   | 0.89 <sup>bc</sup>  | 1.33 <sup>ab</sup>  | 1.73 <sup>bc</sup>  | 0.98 <sup>e</sup> | 0.81 <sup>cd</sup> | 1.22 <sup>ab</sup> |
| Terpinen-4-ol          | 0.76 $\pm$           | 0.89 $\pm$          | 1 $\pm$             | 0.69 $\pm$          | 1.2 $\pm$           | 0.75 $\pm$          | 0.31 $\pm$        | 0.49 $\pm$         | 0.99 $\pm$         |
|                        | 0.26 <sup>bc</sup>   | 0.12 <sup>bc</sup>  | 0.29 <sup>ab</sup>  | 0.14 <sup>cd</sup>  | 0.12 <sup>a</sup>   | 0.24 <sup>cd</sup>  | 0.11 <sup>e</sup> | 0.29 <sup>e</sup>  | 0.2 <sup>ab</sup>  |
| $\alpha$ -Terpineol    | 4.3 $\pm$            | 4.83 $\pm$          | 4.45 $\pm$          | 3.53 $\pm$          | 4.24 $\pm$          | 3.32 $\pm$          | 2.08 $\pm$        | 3.57 $\pm$         | 5.29 $\pm$         |
|                        | 1.33 <sup>ab</sup>   | 0.47 <sup>ab</sup>  | 0.98 <sup>ab</sup>  | 1.05 <sup>bc</sup>  | 0.32 <sup>bc</sup>  | 0.98 <sup>cd</sup>  | 0.36 <sup>d</sup> | 0.65 <sup>bc</sup> | 1.3 <sup>a</sup>   |
| $\delta$ -Elemene      | 0.66 $\pm$           | 0.86 $\pm$          | 0.8 $\pm$           | 0.43 $\pm$          | 0.44 $\pm$          | 0.4 $\pm$           |                   | 0.21 $\pm$         | 0.52 $\pm$         |
|                        | 0.22 <sup>ab</sup>   | 0.26 <sup>a</sup>   | 0.14 <sup>a</sup>   | 0.14 <sup>c</sup>   | 0.15 <sup>c</sup>   | 0.09 <sup>cd</sup>  | nd                | 0.05 <sup>d</sup>  | 0.11 <sup>bc</sup> |
| (+)-Cyclosativene      | 3.3 $\pm$            | 1.5 $\pm$           | 1.41 $\pm$          | 2.06 $\pm$          | 2.73 $\pm$          | 2.4 $\pm$           | 0.66 $\pm$        | 1.19 $\pm$         | 0.64 $\pm$         |
|                        | 0.74 <sup>a</sup>    | 1.85 <sup>cd</sup>  | 0.88 <sup>cd</sup>  | 0.6 <sup>bc</sup>   | 0.83 <sup>ab</sup>  | 0.57 <sup>ab</sup>  | 0.29 <sup>d</sup> | 0.15 <sup>cd</sup> | 0.27 <sup>d</sup>  |
| Copaene                | 7.53 $\pm$           | 7.46 $\pm$          | 7.58 $\pm$          | 4.76 $\pm$          | 6.08 $\pm$          | 5.42 $\pm$          | 1.35 $\pm$        | 3.02 $\pm$         | 6.41 $\pm$         |
|                        | 1.18 <sup>ab</sup>   | 1.31 <sup>ab</sup>  | 0.59 <sup>a</sup>   | 0.91 <sup>d</sup>   | 1.57 <sup>cd</sup>  | 1.12 <sup>cd</sup>  | 0.79 <sup>f</sup> | 0.41 <sup>e</sup>  | 0.6 <sup>bc</sup>  |
| $\beta$ -Elemene       | 1.87 $\pm$           | 1.96 $\pm$          | 2.86 $\pm$          | 0.95 $\pm$          | 1.2 $\pm$           | 0.91 $\pm$          | 0.28 $\pm$        | 0.6 $\pm$          | 1.33 $\pm$         |
|                        | 0.83 <sup>bc</sup>   | 0.72 <sup>b</sup>   | 0.72 <sup>a</sup>   | 0.55 <sup>de</sup>  | 0.44 <sup>d</sup>   | 0.6 <sup>de</sup>   | 0.17 <sup>f</sup> | 0.1 <sup>ef</sup>  | 0.38 <sup>cd</sup> |
| Sesquithujene          | 1.46 $\pm$           | 1.61 $\pm$          | 1.66 $\pm$          | 0.83 $\pm$          | 1.1 $\pm$           | 0.82 $\pm$          | 0.21 $\pm$        | 0.48 $\pm$         | 1.14 $\pm$         |
|                        | 0.37 <sup>a</sup>    | 0.38 <sup>a</sup>   | 0.08 <sup>a</sup>   | 0.16 <sup>c</sup>   | 0.27 <sup>b</sup>   | 0.14 <sup>c</sup>   | 0.12 <sup>e</sup> | 0.09 <sup>d</sup>  | 0.09 <sup>b</sup>  |
| $\alpha$ -Bergamotene  | 0.75 $\pm$           | 0.74 $\pm$          | 0.79 $\pm$          | 0.4 $\pm$           | 0.57 $\pm$          | 0.39 $\pm$          |                   | 0.22 $\pm$         | 0.66 $\pm$         |
|                        | 0.19 <sup>a</sup>    | 0.19 <sup>a</sup>   | 0.21 <sup>a</sup>   | 0.09 <sup>cd</sup>  | 0.25 <sup>bc</sup>  | 0.15 <sup>d</sup>   | nd                | 0.07 <sup>e</sup>  | 0.09 <sup>ab</sup> |
| (E)- $\beta$ -Famesene | 2.72 $\pm$           | 2.86 $\pm$          | 2.25 $\pm$          | 1.21 $\pm$          | 1.43 $\pm$          | 1.02 $\pm$          | 0.29 $\pm$        | 0.51 $\pm$         | 1.98 $\pm$         |
|                        | 0.54 <sup>a</sup>    | 0.73 <sup>a</sup>   | 0.27 <sup>b</sup>   | 0.37 <sup>c</sup>   | 0.56 <sup>c</sup>   | 0.49 <sup>c</sup>   | 0.1 <sup>d</sup>  | 0.16 <sup>d</sup>  | 0.26 <sup>b</sup>  |
| Alloaromadendren       | 8.89 $\pm$           | 8.43 $\pm$          | 7.58 $\pm$          | 4.34 $\pm$          | 5.18 $\pm$          | 4.28 $\pm$          | 1.07 $\pm$        | 2.11 $\pm$         | 7.41 $\pm$         |
|                        | 1.75 <sup>a</sup>    | 3.12 <sup>a</sup>   | 0.99 <sup>a</sup>   | 1.16 <sup>b</sup>   | 1.63 <sup>b</sup>   | 1.15 <sup>b</sup>   | 0.67 <sup>c</sup> | 0.43 <sup>c</sup>  | 0.46 <sup>a</sup>  |
| $\beta$ -Chamigrene    | 2.88 $\pm$           | 5.87 $\pm$          | 3.16 $\pm$          | 1.83 $\pm$          | 2.51 $\pm$          | 2.02 $\pm$          | 0.4 $\pm$         | 0.73 $\pm$         | 3.52 $\pm$         |
|                        | 2.05 <sup>b</sup>    | 2.52 <sup>a</sup>   | 1.65 <sup>b</sup>   | 1.75 <sup>bcd</sup> | 0.67 <sup>bc</sup>  | 1.4 <sup>bcd</sup>  | 0.31 <sup>d</sup> | 0.41 <sup>cd</sup> | 2.05 <sup>b</sup>  |
| $\alpha$ -Curcumene    | 47.49 $\pm$          | 58.98 $\pm$         | 49.13 $\pm$         | 32.91 $\pm$         | 55.61 $\pm$         | 44.09 $\pm$         | 11.77 $\pm$       | 35.55 $\pm$        | 101.82 $\pm$       |
|                        | 10.16 <sup>cd</sup>  | 7.14 <sup>b</sup>   | 2.78 <sup>bcd</sup> | 12.4 <sup>f</sup>   | 13.97 <sup>bc</sup> | 14.4 <sup>de</sup>  | 6.74 <sup>g</sup> | 5.54 <sup>ef</sup> | 14.82 <sup>a</sup> |

|                      |                     |                    |                     |                     |                      |                     |                    |                    |                    |
|----------------------|---------------------|--------------------|---------------------|---------------------|----------------------|---------------------|--------------------|--------------------|--------------------|
| Zingiberene          | 463.07±7            | 505.37±1           | 471.04±             | 314.43±             | 392.12±              | 360.83±             | 149.84±            | 208.78±            | 603.56±            |
|                      | 6.51 <sup>bc</sup>  | 17.43 <sup>b</sup> | 25.88 <sup>bc</sup> | 70.16 <sup>d</sup>  | 115.97 <sup>cd</sup> | 72.7 <sup>d</sup>   | 59.5 <sup>e</sup>  | 29.66 <sup>e</sup> | 77.95 <sup>a</sup> |
| α-Bulnesene          | 2.19±               | 2.12±              | 1.47±               | 1.15±               | 1.51±                | 1.55±               | 0.3±               | 0.67±              | 2.08±              |
|                      | 0.51 <sup>a</sup>   | 0.65 <sup>ab</sup> | 0.46 <sup>bc</sup>  | 0.42 <sup>cd</sup>  | 0.68 <sup>abc</sup>  | 0.51 <sup>abc</sup> | 0.13 <sup>e</sup>  | 0.29 <sup>de</sup> | 1.25 <sup>ab</sup> |
| β-Bisabololene       | 124.15±             | 136.96±            | 133.29±             | 86.95±              | 106.29±              | 89.02±              | 37.18±             | 57.94±             | 181.5±             |
|                      | 15.08 <sup>bc</sup> | 25.75 <sup>b</sup> | 7.57 <sup>b</sup>   | 22.63 <sup>d</sup>  | 32.99 <sup>cd</sup>  | 20.07 <sup>d</sup>  | 14.23 <sup>e</sup> | 8.25 <sup>e</sup>  | 23.61 <sup>a</sup> |
| β-Sesquiphellandrene | 119.93±             | 126.09±            | 119.96±             | 75.75±              | 94.02±               | 91.57±              | 36.79±             | 53.97±             | 177.41±            |
|                      | 13.92 <sup>b</sup>  | 26.87 <sup>b</sup> | 8.47 <sup>b</sup>   | 13.97 <sup>c</sup>  | 27.42 <sup>c</sup>   | 22.19 <sup>c</sup>  | 14.65 <sup>d</sup> | 7.07 <sup>d</sup>  | 21.84 <sup>a</sup> |
| (E)-γ-Bisabolene     | 3.91±               | 3.56±              | 3.59±               | 2.16±               | 2.71±                | 2.71±               | 0.91±              | 1.27±              | 4.42±              |
|                      | 0.68 <sup>ab</sup>  | 0.7 <sup>b</sup>   | 0.7 <sup>b</sup>    | 0.23 <sup>c</sup>   | 0.98 <sup>c</sup>    | 0.58 <sup>c</sup>   | 0.57 <sup>d</sup>  | 0.36 <sup>d</sup>  | 0.61 <sup>a</sup>  |
| Germacrene B         | 5.47±               | 5.93±              | 5.11±               | 3.43±               | 4.21±                | 3.64±               | 1.34±              | 2.07±              | 6.82±              |
|                      | 0.61 <sup>b</sup>   | 1.63 <sup>ab</sup> | 0.76 <sup>bc</sup>  | 0.55 <sup>d</sup>   | 1.29 <sup>cd</sup>   | 0.79 <sup>d</sup>   | 0.63 <sup>e</sup>  | 0.41 <sup>e</sup>  | 1.14 <sup>a</sup>  |
| <b>Ketones</b>       |                     |                    |                     |                     |                      |                     |                    |                    |                    |
| 2-Heptanone          | 0.35±               | 0.3±               | 0.28±               | 0.33±               | 0.29±                | 0.24±               | nd                 | 0.26±              | 3.29±              |
|                      | 0.08 <sup>b</sup>   | 0.04 <sup>b</sup>  | 0.05 <sup>b</sup>   | 0.07 <sup>b</sup>   | 0.08 <sup>b</sup>    | 0.11 <sup>b</sup>   |                    | 0.07 <sup>b</sup>  | 0.48 <sup>a</sup>  |
| Sulcatone            | 0.41±               | 0.56±              | 0.99±               | 0.85±               | 0.49±                | 0.3±                | nd                 | 1.35±              | 30.34±             |
|                      | 0.18 <sup>b</sup>   | 0.11 <sup>b</sup>  | 0.09 <sup>b</sup>   | 0.11 <sup>b</sup>   | 0.17 <sup>b</sup>    | 0.12 <sup>b</sup>   |                    | 0.2 <sup>b</sup>   | 7.14 <sup>a</sup>  |
| 2-Nonanone           | 1.66±               | 1.71±              | 1.4±                | 0.99±               | 1.2±                 | 0.88±               | nd                 | 0.43±              | 4.34±              |
|                      | 0.7 <sup>b</sup>    | 0.39 <sup>b</sup>  | 0.36 <sup>bc</sup>  | 0.43 <sup>cd</sup>  | 0.28 <sup>cd</sup>   | 0.38 <sup>d</sup>   |                    | 0.19 <sup>e</sup>  | 0.43 <sup>a</sup>  |
| 2-Undecanone         | 2.71±               | 2.94±              | 2.25±               | 1.58±               | 1.96±                | 1.67±               | 0.31±              | 0.41±              | 3.85±              |
|                      | 1.1 <sup>b</sup>    | 0.61 <sup>b</sup>  | 0.89 <sup>bc</sup>  | 0.75 <sup>c</sup>   | 0.37 <sup>c</sup>    | 0.54 <sup>c</sup>   | 0.12 <sup>d</sup>  | 0.24 <sup>d</sup>  | 0.84 <sup>a</sup>  |
| <b>Aldehydes</b>     |                     |                    |                     |                     |                      |                     |                    |                    |                    |
| Octanal              | 0.81±               | 0.68±              | 0.63±               | 0.57±               | 0.55±                | 0.36±               | nd                 | 0.38±              | nd                 |
|                      | 0.36 <sup>a</sup>   | 0.16 <sup>ab</sup> | 0.26 <sup>abc</sup> | 0.27 <sup>abc</sup> | 0.36 <sup>bcd</sup>  | 0.18 <sup>d</sup>   |                    | 0.04 <sup>cd</sup> |                    |
| Citronellal          | 2.32±               | 1.98±              | 1.34±               | 1.35±               | 0.97±                | 1.15±               | 0.27±              | 0.62±              | nd                 |
|                      | 0.52 <sup>a</sup>   | 0.27 <sup>a</sup>  | 0.18 <sup>b</sup>   | 0.55 <sup>b</sup>   | 0.18 <sup>c</sup>    | 0.35 <sup>bc</sup>  | 0.12 <sup>de</sup> | 0.35 <sup>d</sup>  |                    |
| β-Citral             | 22.02±              | 28.07±             | 27.2±               | 11.57±              | 19.17±               | 18.11±              | 8.38±              | 6.78±              | 19.23±             |
|                      | 4.08 <sup>b</sup>   | 3.76 <sup>a</sup>  | 2.19 <sup>a</sup>   | 1.65 <sup>d</sup>   | 4.29 <sup>bc</sup>   | 3.08 <sup>c</sup>   | 2.21 <sup>de</sup> | 0.65 <sup>e</sup>  | 6.86 <sup>bc</sup> |
| α-Citral             | 37.21±              | 44.55±             | 33.74±              | 11.1±               | 18.39±               | 25.21±              | 11.31±             | 6.53±              | 33.39±             |
|                      | 9.88 <sup>b</sup>   | 7.13 <sup>a</sup>  | 3.63 <sup>b</sup>   | 2.22 <sup>e</sup>   | 3.03 <sup>d</sup>    | 9.25 <sup>c</sup>   | 2.69 <sup>e</sup>  | 0.63 <sup>e</sup>  | 10.04 <sup>b</sup> |
| <b>Alcohols</b>      |                     |                    |                     |                     |                      |                     |                    |                    |                    |
| 2-Heptanol           | 1.91±               | 2.11±              | 1.87±               | 3.14±               | 2.56±                | 2.11±               | 0.43±              | 1.51±              | 7.12±              |
|                      | 0.45 <sup>de</sup>  | 0.34 <sup>d</sup>  | 0.19 <sup>de</sup>  | 0.57 <sup>b</sup>   | 0.31 <sup>c</sup>    | 0.55 <sup>d</sup>   | 0.15 <sup>f</sup>  | 0.24 <sup>e</sup>  | 0.51 <sup>a</sup>  |
| Eucalyptol           | 76.04±              | 76.21±             | 85.36±              | 50.85±              | 79.9±                | 51.18±              | 16.92±             | 57.08±             | 188.87±            |
|                      | 16.26 <sup>b</sup>  | 11.81 <sup>b</sup> | 8.89 <sup>b</sup>   | 7.89 <sup>c</sup>   | 11.4 <sup>b</sup>    | 6.12 <sup>c</sup>   | 5.43 <sup>d</sup>  | 7.4 <sup>c</sup>   | 36.32 <sup>a</sup> |
| Linalool             | 4.27±               | 4.62±              | 5.51±               | 4.79±               | 4.92±                | 3.26±               | 1.64±              | 3.54±              | 10.91±             |
|                      | 1.59 <sup>cd</sup>  | 1.14 <sup>bc</sup> | 0.96 <sup>b</sup>   | 0.76 <sup>bc</sup>  | 1.37 <sup>bc</sup>   | 0.55 <sup>d</sup>   | 0.68 <sup>e</sup>  | 0.51 <sup>d</sup>  | 0.85 <sup>a</sup>  |
| <b>Esters</b>        |                     |                    |                     |                     |                      |                     |                    |                    |                    |
| Isobornyl acetate    | 2.06±               | 2.24±              | 2.23±               | 1.16±               | 2.16±                | 1.53±               | 0.89±              | 1.15±              | 1.4±               |
|                      | 0.21 <sup>a</sup>   | 0.35 <sup>a</sup>  | 0.18 <sup>a</sup>   | 0.43 <sup>cd</sup>  | 0.41 <sup>a</sup>    | 0.22 <sup>b</sup>   | 0.3 <sup>d</sup>   | 0.15 <sup>cd</sup> | 0.34 <sup>bc</sup> |
| Citronellol acetate  | 0.43±               | 0.43±              | 0.4±                | 0.19±               | 0.18±                | 0.25±               | nd                 | nd                 | nd                 |
|                      | 0.17 <sup>a</sup>   | 0.22 <sup>a</sup>  | 0.11 <sup>a</sup>   | 0.06 <sup>b</sup>   | 0.07 <sup>b</sup>    | 0.16 <sup>b</sup>   |                    |                    |                    |

| Alkenes                 |                     |                     |                   |                     |                    |                     |                   |                    |                    |
|-------------------------|---------------------|---------------------|-------------------|---------------------|--------------------|---------------------|-------------------|--------------------|--------------------|
| $\alpha$ -Naginatene    | 0.93±               | 0.9±                | 1.25±             | 1.18±               | 0.84±              | 0.44±               | 0.26±             | 0.99±              | 0.63±              |
|                         | 0.48 <sup>abc</sup> | 0.37 <sup>bcd</sup> | 0.21 <sup>a</sup> | 0.2 <sup>ab</sup>   | 0.4 <sup>cd</sup>  | 0.24 <sup>ef</sup>  | 0.13 <sup>f</sup> | 0.3 <sup>abc</sup> | 0.12 <sup>de</sup> |
| (3E)-4,8-dimeth ylnona- | 0.52±               | 0.41±               | 0.57±             | 0.44±               | 0.52±              | 0.36±               | 0.16±             | 0.25±              | 0.64±              |
| 1,3,7-triene            | 0.3 <sup>ab</sup>   | 0.22 <sup>abc</sup> | 0.33 <sup>a</sup> | 0.19 <sup>abc</sup> | 0.22 <sup>ab</sup> | 0.18 <sup>abc</sup> | 0.06 <sup>c</sup> | 0.09 <sup>bc</sup> | 0.26 <sup>a</sup>  |

<sup>1</sup> Notes: nd, not detected. Different letter (a–g) in the same line indicate statistically significant differences ( $p < 0.05$ , Waller-Duncan's Text). Data are represented as the mean  $\pm$  SD (n=6). HAD-50: hot air drying at 50 °C; HAD-60: hot air drying at 60 °C; HAD-70: hot air drying at 70 °C; VD-50: vacuum drying at 50 °C; VD-60: vacuum drying at 60 °C; VD-70: vacuum drying at 70 °C; VFD: vacuum freeze drying; SD: sun drying; FG: fresh ginger.

Table S2

The types, formula, and sensory description of flavor components in gingers by fast GC e-nose.

| NO. | Compounds               | Formula                           | CAS        | RI-m, | RI-r, | RI-m,    | RI-r,    | Sensory Description                                |
|-----|-------------------------|-----------------------------------|------------|-------|-------|----------|----------|----------------------------------------------------|
|     |                         |                                   |            | MXT-5 | MXT-5 | MXT-1701 | MXT-1701 |                                                    |
| 1   | Propanal                | C <sub>3</sub> H <sub>6</sub> O   | 123-38-6   | 486   | 499   | 570      | 579      | Spicy; Nutty; Plastic; Cocoa                       |
| 2   | Dimethyl sulfide        | C <sub>2</sub> H <sub>6</sub> S   | 75-18-3    | 508   | 509   | 590      | 573      | Sweet; Cabbage; Gasoline; On-ion; fruity           |
| 3   | 2-Methylthiophene       | C <sub>5</sub> H <sub>6</sub> S   | 554-14-3   | 778   | 775   | 798      | 827      | Sweet; Onion; Green; Gasoline                      |
| 4   | Hexanal                 | C <sub>6</sub> H <sub>12</sub> O  | 66-25-1    | 803   | 801   | 894      | 890      | Sweet; Fresh; Fruity; Green; Herbaceous            |
| 5   | $\alpha$ -Pinene        | C <sub>10</sub> H <sub>16</sub>   | 80-56-8    | 951   | 937   | 942      | 945      | Sweet; Camphor; Citrus; Fruity; Green              |
| 6   | $\beta$ -Pinene         | C <sub>10</sub> H <sub>16</sub>   | 127-91-3   | 970   | 979   | 967      | 994      | Sweet; Pine; Resinous; woody                       |
| 7   | Myrcene                 | C <sub>10</sub> H <sub>16</sub>   | 123-35-3   | 995   | 996   | 1012     | 1025     | Spicy; Nutty; Plastic; Balsamic                    |
| 8   | $\alpha$ -Phellandrene  | C <sub>10</sub> H <sub>16</sub>   | 99-83-2    | 1021  | 1004  | 1029     | 1029     | Spicy; Minty; Citrus; Green                        |
| 9   | $\beta$ -Phellandrene   | C <sub>10</sub> H <sub>16</sub>   | 555-10-2   | 1049  | 1031  | 1063     | 1059     | Minty; Herbaceous; Pleasant; Fruity; Terpenic      |
| 10  | $\gamma$ -Terpinene     | C <sub>10</sub> H <sub>16</sub>   | 99-85-4    | 1073  | 1060  | 1111     | 1089     | Sweet; Citrus; Fruity; Gasoline; Herbaceous; Lemon |
| 11  | Terpinolene             | C <sub>10</sub> H <sub>16</sub>   | 586-62-9   | 1073  | 1088  | 1111     | 1112     | Fruity; Green; Juicy; anisic                       |
| 12  | Linalool                | C <sub>10</sub> H <sub>18</sub> O | 78-70-6    | 1105  | 1107  | 1199     | 1198     | Spicy; Anise; Citrus; Floral; Fragrant             |
| 13  | (E, E)-2,4-Octadienal   | C <sub>8</sub> H <sub>12</sub> O  | 30361-28-5 | 1119  | 1115  | 1253     | 1247     | Fruity; Cucumber; Melon; Seaweed                   |
| 14  | Citronellal             | C <sub>10</sub> H <sub>18</sub> O | 106-23-0   | 1161  | 1158  | 1263     | 1259     | Sweet; Aldehydic; Citrus; Lemon                    |
| 15  | Terpinen-4-ol           | C <sub>10</sub> H <sub>18</sub> O | 562-74-3   | 1171  | 1177  | 1282     | 1272     | Spicy; Pepper; Herbaceous; Licorice; Moldy         |
| 16  | $\alpha$ -Terpineol     | C <sub>10</sub> H <sub>18</sub> O | 98-55-5    | 1196  | 1189  | 1300     | 1300     | Minty; Anise; Lilac; Citrus; Floral                |
| 17  | Decanal                 | C <sub>10</sub> H <sub>20</sub> O | 112-31-2   | 1214  | 1219  | 1310     | 1315     | Sweet; Lemon; Orange; Aldehydic; Burnt; Citrus     |
| 18  | Geraniol                | C <sub>10</sub> H <sub>18</sub> O | 106-24-1   | 1257  | 1255  | 1378     | 1376     | Sweet; Citrus; Rose; Floral; Fruity                |
| 19  | $\alpha$ -Terpinen-7-al | C <sub>10</sub> H <sub>14</sub> O | 1197-15-5  | 1284  | 1282  | 1408     | 1415     | Spicy; Fatty                                       |
| 20  | 2,4-Decadienal, (E,Z)-  | C <sub>10</sub> H <sub>16</sub> O | 25152-83-4 | 1300  | 1295  | 1434     | 1432     | Deep-fried; Fatty; Fried; Geranium; Green          |

|    |                        |                                                |            |      |      |       |      |                                           |
|----|------------------------|------------------------------------------------|------------|------|------|-------|------|-------------------------------------------|
| 21 | Anethole               | C <sub>10</sub> H <sub>12</sub> O              | 4180-23-8  | 1311 | 1310 | 1442  | 1459 | Spicy; Anise; Herbaceous; Licorice; Sweet |
| 22 | Decyl acetate          | C <sub>12</sub> H <sub>24</sub> O <sub>2</sub> | 112-17-4   | 1412 | 1408 | 1487  | 1479 | Fruity; Citrus; Fresh; Orange; Soapy      |
| 23 | $\beta$ -Caryophyllene | C <sub>17</sub> H <sub>28</sub>                | 87-44-5    | 1486 | 1482 | 1501  | 1514 | Spicy; Fruity; Green; Musty; Sweet        |
| 24 | $\alpha$ -Curcumene    | C <sub>15</sub> H <sub>22</sub>                | 644-30-4   | 1505 | 1483 | ---   | ---  | Fruity; Herbaceous                        |
| 25 | Zingiberene            | C <sub>15</sub> H <sub>24</sub>                | 495-60-3   | 1517 | 1495 | ---   | ---  | Spicy; Pungent                            |
| 26 | 8-Methyl pentadecane   | C <sub>16</sub> H <sub>34</sub>                | 22306-28-1 | 1545 | 1545 | 54.09 | 1542 | ---                                       |
| 27 | n-Nonylcyclohexane     | C <sub>15</sub> H <sub>30</sub>                | 2883-2-5   | 1549 | 1556 | 1565  | 1570 | ---                                       |

<sup>1</sup> Note: RI-m, MXT-5 and RI-m, MXT-1701: Retention index measured by n-alkanes in column MXT-5 or MXT-1701; RI-r, MXT-5 and RI-r, MXT-1701: the reference of theoretical retention index in two different columns. CAS: Chemical Abstracts Service registry number.

**Table S3**  
The relative contents of different drying methods in gingers by fast GC e-nose.

| Compounds               | relative contents (% , mean $\pm$ SD) |                               |                               |                                |                                |                                |                                |                                |                                |
|-------------------------|---------------------------------------|-------------------------------|-------------------------------|--------------------------------|--------------------------------|--------------------------------|--------------------------------|--------------------------------|--------------------------------|
|                         | HAD-50                                | HAD-60                        | HAD-70                        | VD-50                          | VD-60                          | VD-70                          | VFD                            | SD                             | FG                             |
| $\beta$ -Phellandrene   | 25.23 $\pm$ 0.01 <sup>e</sup>         | 29.77 $\pm$ 0.02 <sup>d</sup> | 31.00 $\pm$ 0.01 <sup>d</sup> | 42.11 $\pm$ 0.01 <sup>b</sup>  | 45.10 $\pm$ 0.00 <sup>a</sup>  | 44.8 $\pm$ 0.00 <sup>a</sup>   | 45.73 $\pm$ 0.00 <sup>a</sup>  | 41.31 $\pm$ 0.01 <sup>b</sup>  | 36.59 $\pm$ 0.00 <sup>c</sup>  |
| Zingiberene             | 26.24 $\pm$ 0.23 <sup>a</sup>         | 21.63 $\pm$ 0.07 <sup>b</sup> | 22.60 $\pm$ 0.03 <sup>b</sup> | 14.38 $\pm$ 0.04 <sup>cd</sup> | 12.66 $\pm$ 0.02 <sup>de</sup> | 12.28 $\pm$ 0.04 <sup>e</sup>  | 15.50 $\pm$ 0.12 <sup>c</sup>  | 15.75 $\pm$ 0.02 <sup>c</sup>  | 16.34 $\pm$ 0.03 <sup>c</sup>  |
| $\beta$ -Pinene         | 3.58 $\pm$ 0.03 <sup>g</sup>          | 6.50 $\pm$ 0.04 <sup>f</sup>  | 6.33 $\pm$ 0.02 <sup>f</sup>  | 9.52 $\pm$ 0.02 <sup>d</sup>   | 10.70 $\pm$ 0.01 <sup>bc</sup> | 12.44 $\pm$ 0.00 <sup>a</sup>  | 7.52 $\pm$ 0.02 <sup>e</sup>   | 9.83 $\pm$ 0.01 <sup>cd</sup>  | 10.92 $\pm$ 0.02 <sup>b</sup>  |
| n-Nonylcyclohexane      | 9.30 $\pm$ 0.03 <sup>a</sup>          | 7.97 $\pm$ 0.03 <sup>ab</sup> | 6.79 $\pm$ 0.02 <sup>bc</sup> | 5.31 $\pm$ 0.01 <sup>cde</sup> | 4.53 $\pm$ 0.01 <sup>de</sup>  | 3.58 $\pm$ 0.01 <sup>e</sup>   | 5.55 $\pm$ 0.01 <sup>cde</sup> | 4.63 $\pm$ 0.02 <sup>cde</sup> | 6.19 $\pm$ 0.02 <sup>bed</sup> |
| Myrcene                 | 2.18 $\pm$ 0.14 <sup>f</sup>          | 2.97 $\pm$ 0.31 <sup>e</sup>  | 3.03 $\pm$ 0.25 <sup>e</sup>  | 4.31 $\pm$ 0.30 <sup>ab</sup>  | 4.24 $\pm$ 0.18 <sup>b</sup>   | 4.52 $\pm$ 0.20 <sup>a</sup>   | 3.52 $\pm$ 0.46 <sup>c</sup>   | 4.15 $\pm$ 0.21 <sup>b</sup>   | 3.29 $\pm$ 0.23 <sup>d</sup>   |
| $\alpha$ -Phellandrene  | 2.12 $\pm$ 0.28 <sup>d</sup>          | 2.22 $\pm$ 0.99 <sup>d</sup>  | 2.34 $\pm$ 0.80 <sup>d</sup>  | 3.36 $\pm$ 0.71 <sup>b</sup>   | 3.77 $\pm$ 0.43 <sup>a</sup>   | 3.64 $\pm$ 0.47 <sup>a</sup>   | 3.87 $\pm$ 0.78 <sup>a</sup>   | 3.04 $\pm$ 0.61 <sup>c</sup>   | 3.63 $\pm$ 0.40 <sup>ab</sup>  |
| $\alpha$ -Pinene        | 1.16 $\pm$ 0.07 <sup>f</sup>          | 1.89 $\pm$ 0.20 <sup>e</sup>  | 1.77 $\pm$ 0.20 <sup>e</sup>  | 3.15 $\pm$ 0.10 <sup>c</sup>   | 3.75 $\pm$ 0.08 <sup>b</sup>   | 4.15 $\pm$ 0.11 <sup>a</sup>   | 2.63 $\pm$ 0.24 <sup>d</sup>   | 2.91 $\pm$ 0.12 <sup>cd</sup>  | 4.29 $\pm$ 0.16 <sup>a</sup>   |
| 8-Methyl pentadecane    | 4.32 $\pm$ 0.07 <sup>a</sup>          | 3.64 $\pm$ 0.23 <sup>b</sup>  | 3.80 $\pm$ 0.15 <sup>b</sup>  | 2.44 $\pm$ 0.07 <sup>d</sup>   | 2.07 $\pm$ 0.09 <sup>e</sup>   | 2.02 $\pm$ 0.09 <sup>e</sup>   | 2.56 $\pm$ 0.43 <sup>cd</sup>  | 2.63 $\pm$ 0.10 <sup>cd</sup>  | 2.85 $\pm$ 0.15 <sup>c</sup>   |
| $\alpha$ -Terpinen-7-al | 6.35 $\pm$ 0.76 <sup>a</sup>          | 6.01 $\pm$ 2.12 <sup>a</sup>  | 5.16 $\pm$ 1.69 <sup>b</sup>  | 3.05 $\pm$ 0.18 <sup>cd</sup>  | 2.98 $\pm$ 0.66 <sup>cde</sup> | 2.80 $\pm$ 0.99 <sup>cde</sup> | 2.69 $\pm$ 3.86 <sup>de</sup>  | 3.25 $\pm$ 0.99 <sup>c</sup>   | 2.49 $\pm$ 1.57 <sup>e</sup>   |
| $\alpha$ -Curcumene     | 3.77 $\pm$ 0.01 <sup>ab</sup>         | 3.19 $\pm$ 0.05 <sup>ab</sup> | 3.44 $\pm$ 0.04 <sup>ab</sup> | 1.99 $\pm$ 0.00 <sup>ab</sup>  | 1.75 $\pm$ 0.00 <sup>b</sup>   | 1.62 $\pm$ 0.02 <sup>b</sup>   | 2.12 $\pm$ 0.06 <sup>ab</sup>  | 2.38 $\pm$ 0.02 <sup>ab</sup>  | 5.09 $\pm$ 0.06 <sup>a</sup>   |
| Geraniol                | 3.39 $\pm$ 0.08 <sup>a</sup>          | 3.06 $\pm$ 0.08 <sup>b</sup>  | 2.67 $\pm$ 0.06 <sup>c</sup>  | 1.95 $\pm$ 0.02 <sup>d</sup>   | 1.53 $\pm$ 0.01 <sup>e</sup>   | 1.47 $\pm$ 0.03 <sup>e</sup>   | 1.28 $\pm$ 0.07 <sup>e</sup>   | 2.03 $\pm$ 0.05 <sup>d</sup>   | 1.31 $\pm$ 0.06 <sup>e</sup>   |
| Linalool                | 2.03 $\pm$ 0.13 <sup>a</sup>          | 2.15 $\pm$ 0.19 <sup>a</sup>  | 2.05 $\pm$ 0.10 <sup>a</sup>  | 1.82 $\pm$ 0.06 <sup>b</sup>   | 1.50 $\pm$ 0.02 <sup>c</sup>   | 1.49 $\pm$ 0.07 <sup>c</sup>   | 1.40 $\pm$ 0.11 <sup>c</sup>   | 1.80 $\pm$ 0.08 <sup>b</sup>   | 1.39 $\pm$ 0.08 <sup>c</sup>   |

|                        |                         |                         |                          |                         |                         |                          |                         |                          |                          |
|------------------------|-------------------------|-------------------------|--------------------------|-------------------------|-------------------------|--------------------------|-------------------------|--------------------------|--------------------------|
| $\alpha$ -Terpineol    | 2.47±0.02 <sup>b</sup>  | 2.67±0.08 <sup>ab</sup> | 3.02±0.06 <sup>a</sup>   | 1.27±0.01 <sup>c</sup>  | 1.03±0.01 <sup>c</sup>  | 1.07±0.03 <sup>c</sup>   | 1.35±0.06 <sup>c</sup>  | 1.45±0.03 <sup>c</sup>   | 1.07±0.05 <sup>c</sup>   |
| Propanal               | 0.09±0.14 <sup>a</sup>  | 0.07±0.06 <sup>b</sup>  | 0.06±0.02 <sup>bc</sup>  | 0.06±0.02 <sup>bc</sup> | 0.04±0.01 <sup>d</sup>  | 0.03±0.02 <sup>e</sup>   | 0.03±0.05 <sup>e</sup>  | 0.05±0.04 <sup>cd</sup>  | 0.03±0.05 <sup>e</sup>   |
| Dimethyl sulfide       | 0.98±0.04 <sup>a</sup>  | 0.37±0.17 <sup>c</sup>  | 0.17±0.08 <sup>d</sup>   | 0.70±0.02 <sup>b</sup>  | 0.61±0.08 <sup>b</sup>  | 0.45±0.05 <sup>c</sup>   | 0.33±0.06 <sup>c</sup>  | 0.15±0.08 <sup>d</sup>   | 0.06±0.05 <sup>d</sup>   |
| 2-Methylthiophene      | 0.16±0.22 <sup>a</sup>  | 0.15±0.71 <sup>ab</sup> | 0.15±0.22 <sup>ab</sup>  | 0.11±0.05 <sup>ce</sup> | 0.08±0.03 <sup>e</sup>  | 0.07±0.08 <sup>e</sup>   | 0.08±0.31 <sup>e</sup>  | 0.11±0.13 <sup>ce</sup>  | 0.13±0.67 <sup>bc</sup>  |
| Hexanal                | 0.11±0.04 <sup>a</sup>  | 0.08±0.14 <sup>b</sup>  | 0.08±0.17 <sup>b</sup>   | 0.05±0.02 <sup>c</sup>  | 0.04±0.02 <sup>c</sup>  | 0.04±0.03 <sup>c</sup>   | 0.04±0.07 <sup>c</sup>  | 0.09±0.05 <sup>b</sup>   | 0.09±0.07 <sup>b</sup>   |
| $\gamma$ -Terpinene    | 0.37±0.13 <sup>a</sup>  | 0.36±0.38 <sup>ab</sup> | 0.35±0.18 <sup>ab</sup>  | 0.33±0.09 <sup>ab</sup> | 0.34±0.06 <sup>ab</sup> | 0.33±0.13 <sup>abc</sup> | 0.28±0.21 <sup>c</sup>  | 0.33±0.20 <sup>abc</sup> | 0.31±0.17 <sup>bc</sup>  |
| Terpinolene            | 0.72±0.24 <sup>ab</sup> | 0.65±0.59 <sup>b</sup>  | 0.56±0.31 <sup>c</sup>   | 0.67±0.11 <sup>b</sup>  | 0.50±0.12 <sup>cd</sup> | 0.45±0.17 <sup>d</sup>   | 0.50±0.69 <sup>cd</sup> | 0.51±0.29 <sup>cd</sup>  | 0.78±0.35 <sup>a</sup>   |
| (E,E)-2,4-octadienal   | 0.52±0.07 <sup>a</sup>  | 0.51±0.03 <sup>a</sup>  | 0.49±0.04 <sup>a</sup>   | 0.34±0.01 <sup>bc</sup> | 0.29±0.02 <sup>cd</sup> | 0.28±0.02 <sup>cd</sup>  | 0.25±0.07 <sup>d</sup>  | 0.35±0.03 <sup>b</sup>   | 0.18±0.01 <sup>e</sup>   |
| Citronellal            | 0.49±0.12 <sup>a</sup>  | 0.45±0.12 <sup>a</sup>  | 0.44±0.08 <sup>a</sup>   | 0.45±0.03 <sup>a</sup>  | 0.27±0.04 <sup>b</sup>  | 0.32±0.05 <sup>b</sup>   | 0.31±0.07 <sup>b</sup>  | 0.46±0.07 <sup>a</sup>   | 0.24±0.24 <sup>b</sup>   |
| Terpinen-4-ol          | 1.06±0.12 <sup>a</sup>  | 0.92±0.07 <sup>b</sup>  | 0.98±0.07 <sup>ab</sup>  | 0.65±0.04 <sup>c</sup>  | 0.47±0.04 <sup>d</sup>  | 0.49±0.04 <sup>d</sup>   | 0.29±0.05 <sup>e</sup>  | 0.74±0.01 <sup>c</sup>   | 0.32±0.20 <sup>e</sup>   |
| Decanal                | 0.90±0.08 <sup>a</sup>  | 0.87±0.06 <sup>a</sup>  | 0.81±0.06 <sup>a</sup>   | 0.53±0.05 <sup>b</sup>  | 0.41±0.02 <sup>c</sup>  | 0.40±0.03 <sup>c</sup>   | 0.40±0.08 <sup>c</sup>  | 0.52±0.05 <sup>b</sup>   | 0.37±0.15 <sup>c</sup>   |
| 2,4-Decadienal, (E,Z)- | 0.59±0.07 <sup>a</sup>  | 0.44±0.22 <sup>b</sup>  | 0.36±0.22 <sup>cd</sup>  | 0.31±0.10 <sup>d</sup>  | 0.32±0.09 <sup>d</sup>  | 0.28±0.08 <sup>d</sup>   | 0.42±0.42 <sup>bc</sup> | 0.31±0.21 <sup>d</sup>   | 0.60±6.19 <sup>a</sup>   |
| Anethole               | 0.51±0.36 <sup>a</sup>  | 0.38±0.70 <sup>ab</sup> | 0.37±1.38 <sup>ab</sup>  | 0.21±0.50 <sup>cd</sup> | 0.20±0.64 <sup>cd</sup> | 0.18±0.76 <sup>d</sup>   | 0.23±2.57 <sup>bc</sup> | 0.24±1.33 <sup>bc</sup>  | 0.36±2.25 <sup>abc</sup> |
| Decyl acetate          | 0.88±0.07 <sup>a</sup>  | 0.74±0.14 <sup>ab</sup> | 0.82±0.25 <sup>ab</sup>  | 0.66±0.09 <sup>ed</sup> | 0.60±0.10 <sup>ed</sup> | 0.58±0.12 <sup>e</sup>   | 0.78±0.43 <sup>ab</sup> | 0.73±0.23 <sup>bc</sup>  | 0.70±0.41 <sup>bc</sup>  |
| $\beta$ -Caryophyllene | 0.46±0.18 <sup>a</sup>  | 0.34±0.30 <sup>bc</sup> | 0.35±3.33 <sup>abc</sup> | 0.26±0.20 <sup>cd</sup> | 0.22±0.21 <sup>d</sup>  | 0.20±1.75 <sup>d</sup>   | 0.33±0.90 <sup>bc</sup> | 0.25±2.25 <sup>cd</sup>  | 0.38±0.88 <sup>ab</sup>  |

<sup>1</sup> Different letter (a–g) in the same line indicate statistically significant differences ( $p < 0.05$ , Waller-Duncan's Text). Data are represented as the mean  $\pm$  SD ( $n=6$ ). HAD-50: hot air drying at 50 °C; HAD-60: hot air drying at 60 °C; HAD-70: hot air drying at 70 °C; VD-50: vacuum drying at 50 °C; VD-60: vacuum drying at 60 °C; VD-70: vacuum drying at 70 °C; VFD: vacuum freeze drying; SD: sun drying; FG: fresh ginger.
